# Supplementary material for: Synthesis of NiO nanostructures and their catalytic activity in the thermal decomposition of ammonium perchlorate
Source: Royal Society of Chemistry journal article supplement (doi:10.1039/c6ce00627b), 2016-01-01
Supplement: c6ce00627b1.pdf [file c6ce00627b1.pdf]

## **Supporting information**

### **Synthesis of NiO nanostructures and their catalytic activity on the thermal decomposition of ammonium perchlorate**

Yongjie Zhao<sup>1,\*</sup>, Xiaowei Zhang<sup>1</sup>, Xiangming Xu<sup>1</sup>, Yuzhen Zhao<sup>2</sup>, Heping Zhou<sup>2</sup>,

Jingbo Li<sup>1</sup> and HaiBo Jin<sup>1</sup>

<sup>1</sup>School of Materials Science and Engineering, Beijing Institute of Technology,  
Beijing 100081, PR China

<sup>2</sup>State Key Laboratory of New Ceramics and Fine Processing, School of Materials  
Science and Engineering, Tsinghua University, Beijing, 100084, PR China

\*Corresponding authors. E-mail address: [zhaoyjpeace@gmail.com](mailto:zhaoyjpeace@gmail.com)

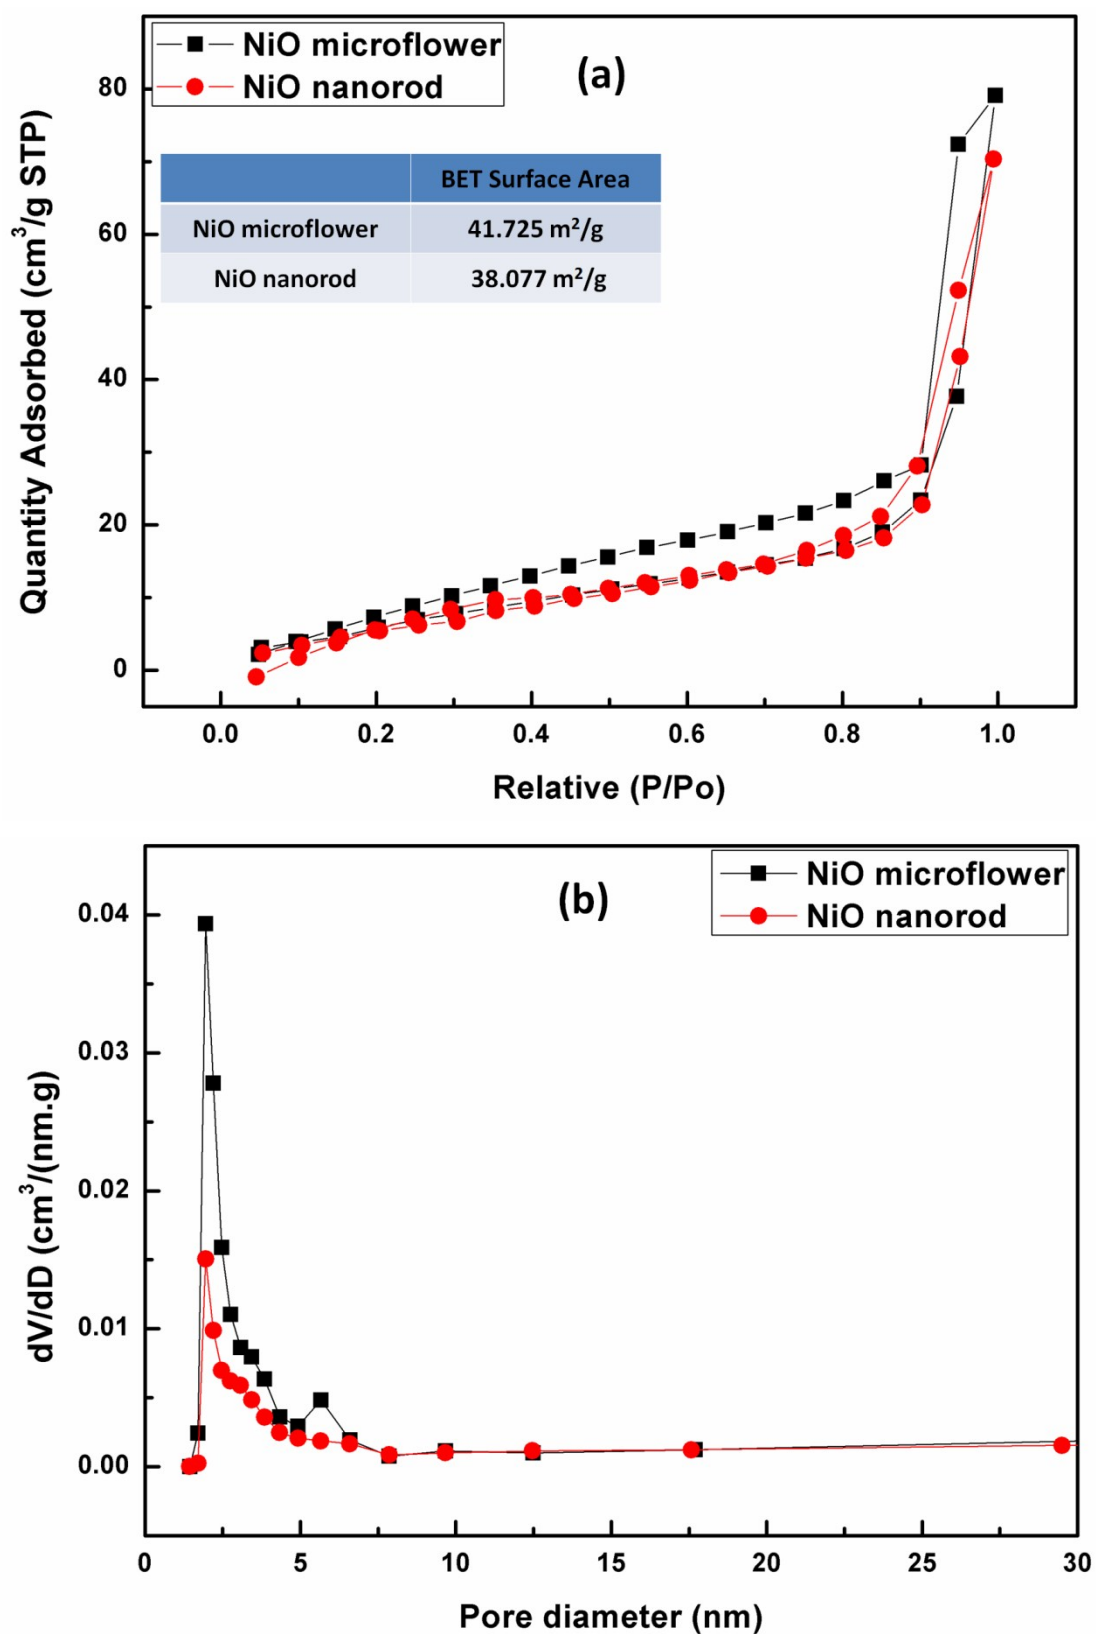

Figure S1. N<sub>2</sub> adsorption-desorption isotherm of the NiO microflowers and nanorod.
